# Supplementary material for: The impact of maternal smoking on embryonic morphological development: the Rotterdam Periconception Cohort
Source: PubMed Central journal article supplement — Hum Reprod. 2022 Feb 23;37(4):696–707. doi: 10.1093/humrep/deac018 (PMC8971648; doi:10.1093/humrep/deac018), 2022-02-23
Supplement: deac018_supplementary_table_si.pdf [file deac018_supplementary_table_si.pdf]

**Supplementary Table S1** Mixed linear modeling of maternal periconceptional smoking and Carnegie stages in female and male embryos.

|                             |                             | Model 1 <sup>a</sup>                   | P                      | Model 2 <sup>b</sup>                   | P     |
|-----------------------------|-----------------------------|----------------------------------------|------------------------|----------------------------------------|-------|
|                             |                             | Effect estimate ( $\beta$ ),<br>95% CI |                        | Effect estimate ( $\beta$ ),<br>95% CI |       |
| Female embryo<br>(N = 344)  | <b>Smoking</b>              |                                        |                        |                                        |       |
|                             | No (N = 301)                | 0 (Reference)                          |                        | 0 (Reference)                          |       |
|                             | Yes (N = 43)                | -0.215 (-0.496; 0.066)                 | 0.133                  | -0.173 (-0.469; 0.122)                 | 0.250 |
|                             | <b>Cigarettes/day</b>       | -0.114 (-0.213; -0.014)                | <b>0.025*</b>          | -0.093 (-0.198; 0.012)                 | 0.082 |
|                             | <b>Smoking, categorical</b> |                                        |                        |                                        |       |
|                             | None (N = 301)              | 0 (Reference)                          |                        | 0 (Reference)                          |       |
| Male embryo<br>(N = 336)    | <b>Smoking</b>              |                                        |                        |                                        |       |
|                             | No (N = 283)                | 0 (Reference)                          |                        | 0 (Reference)                          |       |
|                             | Yes (N = 53)                | 0.005 (-0.235; 0.246)                  | 0.965                  | 0.059 (-0.202; 0.322)                  | 0.653 |
|                             | <b>Cigarettes/day</b>       | -0.037 (-0.114; 0.040)                 | 0.351                  | -0.026 (-0.109; 0.056)                 | 0.529 |
|                             | <b>Smoking, categorical</b> |                                        |                        |                                        |       |
|                             | None (N = 283)              | 0 (Reference)                          |                        | 0 (Reference)                          |       |
| 1–9 cigarettes/day (N = 29) | 0.288 (-0.022; 0.598)       | 0.069                                  | 0.355 (0.025; 0.687)   | <b>0.035*</b>                          |       |
| ≥10 cigarettes/day (N = 24) | -0.338 (-0.677; 0.001)      | 0.051                                  | -0.279 (-0.629; 0.071) | 0.118                                  |       |

\*P &lt; 0.05 (bold text).

<sup>a</sup>Model with gestational age as time predictor.<sup>b</sup>Fully adjusted model with gestational age as time predictor; adjusted for alcohol use, educational level, folic acid supplement use, maternal age, mode of conception, ethnicity, maternal BMI, parity and vitamin use.
